# Supplementary material for: Discourteous Behavior on Extra-Role Performance of University Teachers at Job: Role of Emotions and Hardiness
Source: Preprints.org preprint supplement (doi:10.20944/preprints202308.1453.v1), 2023-08-21
Supplement: Supplementary file 1 [file supplementary]

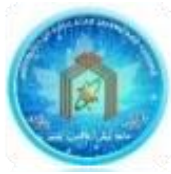

# UNIVERSITY OF KOTLI, AZAD JAMMU AND KASHMIR

Ref. No: EC/UOKAJK/2022/004

Dated: 10-02-2022

## Ethical certificate

### To whom it may concern

This is to certify that the research work presented and conducted in the manuscript titled as “Discourteous Behavior on Extra-Role Performance of Teachers at Job: Role of Emotions and Hardiness” by Dr. Khatiba Akhter and her co-authors is genuine and does not violate any of the ethical and moral consideration, in terms of human use, set by the Ethical committee of University of Kotli, Azad Jammu & Kashmir.

### Ethical Committee University of Kotli

A blue ink signature of Dr. Muhammad Alamzeb, written in a cursive style.

**Dr. Muhammad Alamzeb**  
(Convener)

A blue ink signature of Dr. Nazir Haider Shah, written in a cursive style.

**Dr. Nazir Haider Shah**  
(Member)

A blue ink signature of Dr. Asif Khan, written in a cursive style.

**Dr. Asif Khan**  
(Member)

A blue ink signature of Dr. Rashid Mehmood, written in a cursive style.

**Dr. Rashid Mehmood**  
(Member)
